# Supplementary material
Source: Springer Nature journal article supplement (http://www.springermedizin.de/resource/supplementary/12986_2010_337_MOESM3_ESM.pdf/25655856)

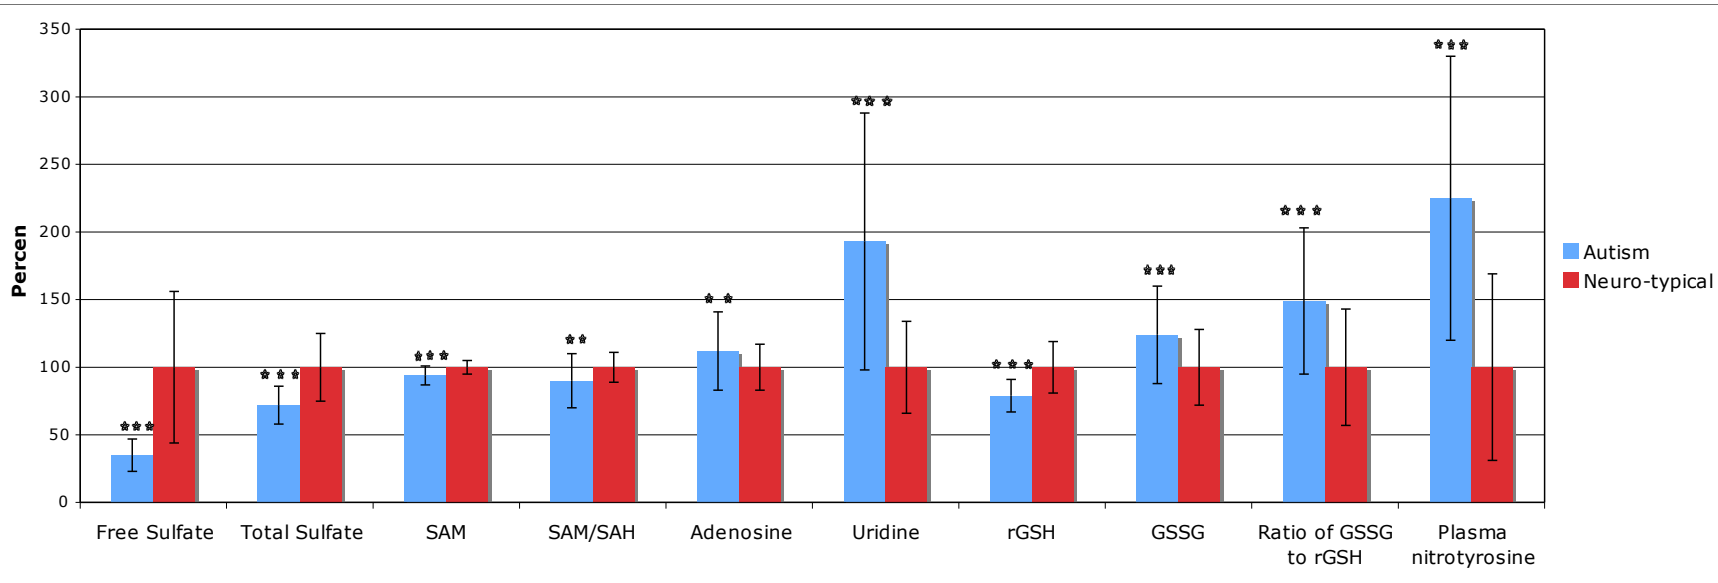

Supplement: MOESM3 [file 25655856]
